## A11

**Title:** DESFLURANE VERSUS ALFENTANYL/NITROUS OXIDE (N<sub>2</sub>O) ANESTHESIA FOR OUTPATIENT LAPAROSCOPY

**Authors:** J. Pavlin, M.D., S. Kallar, M.D., L. Everett, M.D., B. Hautman, M.D., S. Rapp, M.D., J. Luke, M.D., J. Lecky, M.D.

**Affiliation:** Depts. of Anesthesiology, University of Washington, Seattle, WA 98195 and Medical College of Virginia, Richmond, VA 23298

The efficacy of desflurane anesthesia (MAC 6.0 - 7.2%), alone or with N<sub>2</sub>O, was compared to alfentanil: N<sub>2</sub>O in 70 patients undergoing outpatient laparoscopy.

**Methods:** After obtaining institutional review board approval and individual consent, anesthesia was induced by alfentanil, 15 ug/kg and pentothal, 5 mg/kg/iv; patients were then paralyzed by succinylcholine, 1.5 mg/kg/iv, and intubated. They were then randomly assigned to receive 1 MAC Desflurane (Group 1); 1 MAC Desflurane: 60% N<sub>2</sub>O (Group 2); alfentanil 25 ug/kg followed by infusion at 1-2 ug/kg/min plus N<sub>2</sub>O (Group 3). Desflurane concentration or alfentanil infusion was adjusted as needed. Recovery parameters assessed included time until oriented, taking oral fluids, walking, and fit for discharge. Performance on p-deletion and digit substitution tests, sedation scores, visual analogue pain scores (VAS), and emetic symptoms were recorded at 30 min. intervals during recovery.

**Statistical Analysis:** Comparison between groups was by chi square or analysis of variance with multiple range testing by Student Newman-Keuls test.

**Results:** Representative results are shown in Table 1. The groups were of similar age, weight, and surgical duration. There were no statistically significant differences in speed of recovery as judged by clinical criteria or by psychometric tests, except that Group 2 became oriented more slowly than Groups 1 and 3. The number of emeses/patient was greater after alfentanil anesthesia. VAS pain scores were less in Group 1 at 90 mins (p<.05) but not different at 30, 60 or 120 mins. All patients recovered satisfactorily; one was admitted overnight for pain in Group 1, 2 for emetic symptoms in each of Groups 2 and 3.

**Conclusions:** Overall, desflurane anesthesia was characterized by stability of vital signs, ease of use, rapid emergence, and a lesser frequency of emesis.

Table 1. Summary of Results (Mean  $\pm$  S.D.)

|                     | DES<br>1 (n=24) | DES:N <sub>2</sub> O<br>2 (n=23) | ALF:N <sub>2</sub> O<br>3 (n=23) |
|---------------------|-----------------|----------------------------------|----------------------------------|
| Group #             | 1 (n=24)        | 2 (n=23)                         | 3 (n=23)                         |
| Age (yrs)           | 30 (6)          | 28 (5)                           | 29 (5)                           |
| Wt (kg)             | 65 (11)         | 63 (12)                          | 67 (13)                          |
| Duration            | 41 (24)         | 44 (28)                          | 40 (27)                          |
| Surgery(mins)       |                 |                                  |                                  |
| Recovery speed(min) |                 |                                  |                                  |
| Orientation         | 3 (4)!          | 8 (11)**                         | 3 (6)                            |
| Oral fluids         | 67 (28)         | 87 (45)                          | 121 (199)                        |
| Walk                | 117 (71)        | 132 (112)                        | 122 (79)                         |
| Discharge fit       | 150 (65)        | 158 (72)                         | 156 (89)                         |
| % Nauseated         | 21              | 30                               | 35                               |
| % Vomited           | 13              | 13                               | 22                               |
| # Emeses/pt         | .29 (.6)*       | .48 (1)                          | 1.1 (2)                          |

\* p < .05 vs Gp.3; \*\* p < .02 vs Gp. 3; ! p < .02 vs Gp. 2

This study was supported in part by a grant from Anaquest (division of BOC Inc.) as part of a Phase 3, multi-institutional study evaluating the safety and efficacy of desflurane anesthesia.

## A12

**TITLE:** A COMPARISON OF DESFLURANE WITH PROPOFOL IN OUTPATIENTS UNDERGOING PERIPHERAL ORTHOPEDIC SURGERY

**AUTHORS:** S.E. Rapp, M.D., T.J. Conahan, M.D.,\* D.J. Pavlin, M.D., W.J. Levy, M.D.,\* B. Hautman, M.D., J. Luke, M.D., and J. Lecky, M.D.

**AFFILIATION:** Anes. Dept., Univ. of Washington School of Medicine, Seattle, WA 98195  
\*Anes. Dept., Univ. of Pennsylvania, Philadelphia, PA 19104

Rapid, complication-free recovery from anesthesia is desirable in ambulatory patients. The insolubility of the investigational agent desflurane seems to make it a promising agent for outpatients. We combined data from two institutions participating in a multicenter study comparing desflurane and propofol in outpatients undergoing peripheral orthopedic surgery.

Following IRB approval, 91 consenting ASA I-II patients were randomly assigned to one of four anesthetic groups (see Table 1). Baseline psychometric testing was performed. All patients received fentanyl 2  $\mu$ g/kg and d-tubocurarine 3 mg prior to induction. Maximum propofol infusion rate was 12 mg/kg/hr. Maximum end tidal desflurane concentration was 11%. Thereafter, anesthetic depth was increased by fentanyl boluses. Time from dressing placement to recovery was recorded by blinded observers. Pain, sedation, nausea and psychomotor performance (digit substitution, p-deletion) were assessed at 30 minute intervals. Comparisons between treatment groups were by analysis of variance, or by chi square tests. Statistical analysis demonstrated that differences in individual center data did not affect study conclusions or primary outcome variables.

Combined group demography of the two centers was similar with respect to age, weight, sex, duration of surgery and history of previous complications including nausea. Intraoperatively, Group 2 patients required fentanyl supplementation more often than Group 3. Time to emergence, discharge, sedation and pain scores and psychometric test results were similar among groups. Group 2 patients demonstrated less nausea and vomiting and the ability to sit upright sooner than Groups 1, 3 and 4.

Desflurane and propofol both appear to be suitable anesthetics for ambulatory surgery patients. In spite of requiring additional intraoperative narcotic analgesia, Group 2 patients experienced less nausea and vomiting and required antiemetic treatment less often than Groups 1, 3 and 4. Future studies are indicated to evaluate desflurane anesthesia following antiemetic prophylaxis and omission of pre- and intraoperative narcotics.

This study was supported in part by Anaquest, BOC.

TABLE 1. SUMMARY OF RESULTS (Mean  $\pm$  SD or %)

| Group           | 1                    | 2                     | 3                    | 4                  |
|-----------------|----------------------|-----------------------|----------------------|--------------------|
| n               | 22                   | 23                    | 24                   | 22                 |
| Induction       | Prop                 | Prop                  | Des:N <sub>2</sub> O | Des:O <sub>2</sub> |
| Maintenance     | Des:N <sub>2</sub> O | Prop:N <sub>2</sub> O | Des:N <sub>2</sub> O | Des:O <sub>2</sub> |
| Fen supp.(%)    | 27.3                 | 60.9                  | 0*                   | 9.1                |
| Nausea(%)       | 40.9*                | 13.0                  | 66.7*                | 54.6*              |
| Vomiting (%)    | 13.6                 | 8.7                   | 33.3                 | 22.7               |
| NV Meds (%)     | 27.3                 | 0                     | 33.3                 | 40.9*              |
| Sitting#        | 87.4 $\pm$ 63*       | 40.7 $\pm$ 32.7       | 79.9 $\pm$ 55.4*     | 96 $\pm$ 72.2*     |
| Discharge time# | 143 $\pm$ 41.3       | 129.6 $\pm$ 26.2      | 147.6 $\pm$ 62.5     | 160.8 $\pm$ 63.8   |

# times in min after entering recovery room

\* .05 > p > .01 vs. Group 2
